# Supplementary material for: Effect of carbon-skeleton isomerism on the dielectric properties and proton conduction of organic cocrystal compounds assembled from 1,2,4,5-benzenetetracarboxylic acid and piperazine derivatives
Source: Royal Society of Chemistry journal article supplement (doi:10.1039/c9nj01412h), 2019-01-01
Supplement: c9nj01412h1.pdf [file c9nj01412h1.pdf]

## Supporting information for the paper:

### **Effect of Carbon-skeleton Isomerism on Dielectric Property and Proton Conduction of Organic Cocrystal Compounds Assembled from 1,2,4,5-Benzenetetracarboxylic Acid and Piperazine Derivatives**

Xiaoqiang Liang,<sup>\* a</sup> Yixiang Chen,<sup>b</sup> Li Wang,<sup>a</sup> Feng Zhang,<sup>\* c</sup> Zenglu Fan,<sup>\* b</sup> Tingting Cao,<sup>a</sup> Yaya Cao,<sup>a</sup> Huifang Zhu,<sup>a</sup> Xinyue He,<sup>a</sup> Bolin Deng,<sup>a</sup> Yazhi You,<sup>a</sup> Yu Dong<sup>a</sup> and Yamei Zhao<sup>a</sup>

<sup>a</sup> *College of Environmental and Chemical Engineering, Xi'an Polytechnic University, Xi'an 710048, PR China*

<sup>b</sup> *College of Textile Science and Engineering, Xi'an Polytechnic University, Xi'an 710048, PR China*

<sup>c</sup> *Key Laboratory of Photochemical Biomaterials and Energy Storage Materials, Heilongjiang Province and College of Chemistry and Chemical Engineering, Harbin Normal University, Harbin 150025, PR China*

## Table of Contents

|                                                                              |         |
|------------------------------------------------------------------------------|---------|
| Crystal data and Structures .....                                            | S2–S5   |
| Infrared Absorption Spectra .....                                            | S6      |
| Powder X-ray Diffraction Patterns.....                                       | S7      |
| Thermogravimetric Analysis Curves .....                                      | S8      |
| Dielectric Properties .....                                                  | S9–S13  |
| Melting Point Measurements .....                                             | S14–S15 |
| Powder X-ray Diffraction Patterns after Dielectric Measurements .....        | S16     |
| Raman Spectroscopy .....                                                     | S17–S18 |
| Proton-conducting Properties .....                                           | S19–S24 |
| Powder X-ray Diffraction Patterns after Proton-conducting Measurements ..... | S25     |

**Table S1.** Hydrogen-bonding geometry parameters (Å, °) for OCC 1 and OCC 2

| D–H...A               | d(D–H)    | d(H...A) | d(D...A)   | ∠(DHA) |
|-----------------------|-----------|----------|------------|--------|
| OCC 1                 |           |          |            |        |
| O(2)–H(2)···O(6a)     | 0.85      | 1.80     | 2.6368(15) | 167    |
| O(4)–H(4A)···O(3b)    | 0.85      | 2.58     | 3.3660(17) | 154    |
| O(7)–H(7)···O(3c)     | 0.85      | 1.78     | 2.6279(15) | 172    |
| O(7)–H(7)···O(4c)     | 0.85      | 2.63     | 3.1517(15) | 121    |
| O(1W)–H(1WA)···O(5)   | 0.903(17) | 2.19(2)  | 3.014(2)   | 151    |
| N(12)–H(2A)···O(1Wd)  | 0.89      | 1.89     | 2.778(13)  | 172    |
| N(12)–H(2B)···O(8e)   | 0.89      | 1.96     | 2.754(13)  | 148    |
| N(14)–H(14C)···O(1Wc) | 0.97      | 2.29     | 3.064(4)   | 136    |
| N(14)–H(14D)···O(8f)  | 0.97      | 2.09     | 2.753(5)   | 124    |
| OCC 2                 |           |          |            |        |
| O(1W)–H(1WD)···O(14a) | 0.85      | 2.49     | 3.0618(18) | 126    |
| N(1)–H(1A)···O(11)    | 0.90      | 1.86     | 2.616(2)   | 141    |
| N(1)–H(1B)···O(1W)    | 0.90      | 1.90     | 2.790(2)   | 172    |
| O(1)–H(1C)···O(5a)    | 0.85      | 2.27     | 2.5834(17) | 102    |
| O(1W)–H(1WC)···O(1b)  | 0.85      | 2.56     | 3.1865(17) | 131    |
| O(1W)–H(1WC)···O(6a)  | 0.85      | 2.33     | 2.9118(18) | 126    |
| N(2)–H(2A)···O(8a)    | 0.89      | 2.01     | 2.738(2)   | 138    |
| O(3)–H(3A)···O(7b)    | 0.85      | 2.55     | 3.2469(18) | 140    |
| O(7)–H(7A)···O(4c)    | 0.85      | 1.81     | 2.6145(19) | 158    |
| O(12)–H(12C)···O(15b) | 0.85      | 1.92     | 2.5268(19) | 127    |
| O(13)–H(13A)···O(10d) | 0.85      | 1.94     | 2.7239(18) | 153    |
| O(16)–H(16A)···O(12c) | 0.85      | 2.46     | 3.1702(19) | 142    |

Symmetry codes : a)  $+x, +y, 1+z$ ; b)  $1-x, -y, -z$ ; c)  $-1+x, 1+y, +z$ ; d)  $1-x, 1-y, -1-z$ ; e)  $-x, 2-y, -z$ ; f)  $+x, +y, -1+z$  for OCC 1; a)  $-1+x, y, z$ ; b)  $x, -1+y, z$ ; c)  $x, 1+y, z$ ; d)  $1+x, y, z$  for OCC 2.

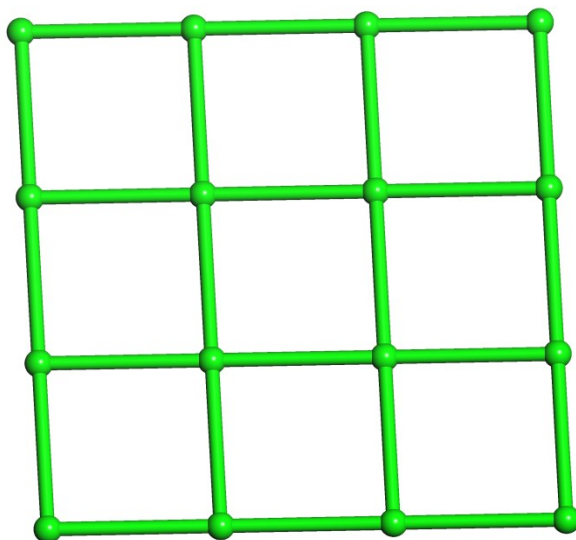

**Fig. S1** A 2D supramolecular network with (4, 4) topology in OCC 1.

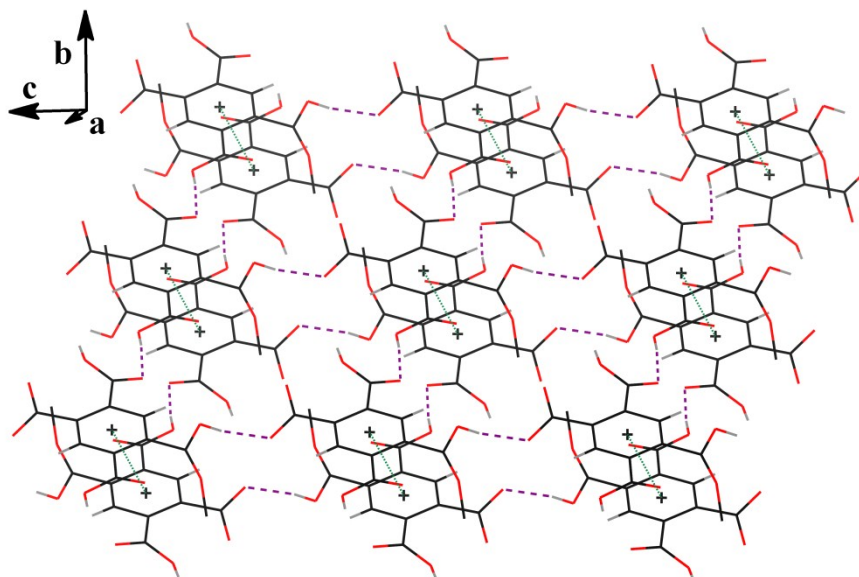

**Fig. S2** The  $\pi$ - $\pi$  stacking interactions of benzene rings in two adjacent layers in OCC 1.

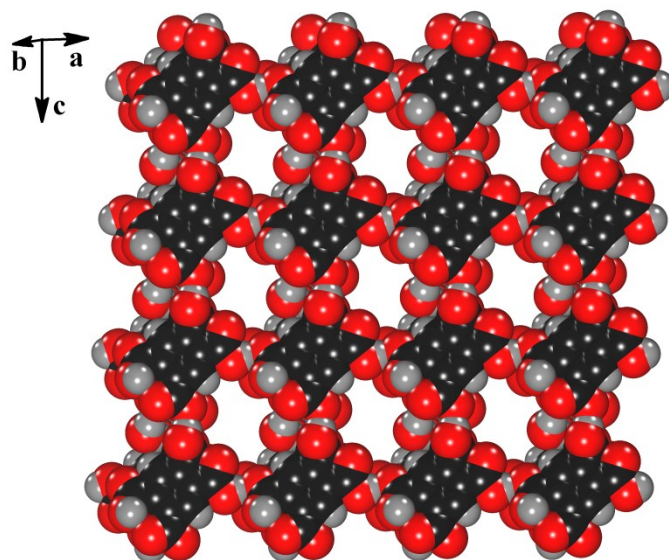

**Fig. S3** The cavity with dimensions of  $5.497 \times 8.062 \text{ \AA}^2$  in OCC 1.

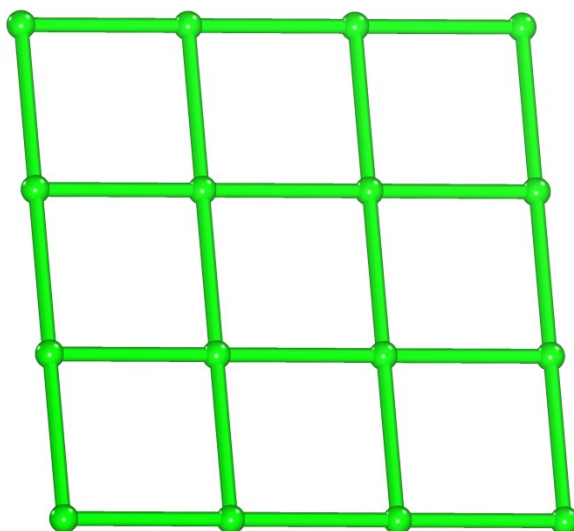

**Fig. S4** A 2D supramolecular network with (4, 4) topology in OCC 2.

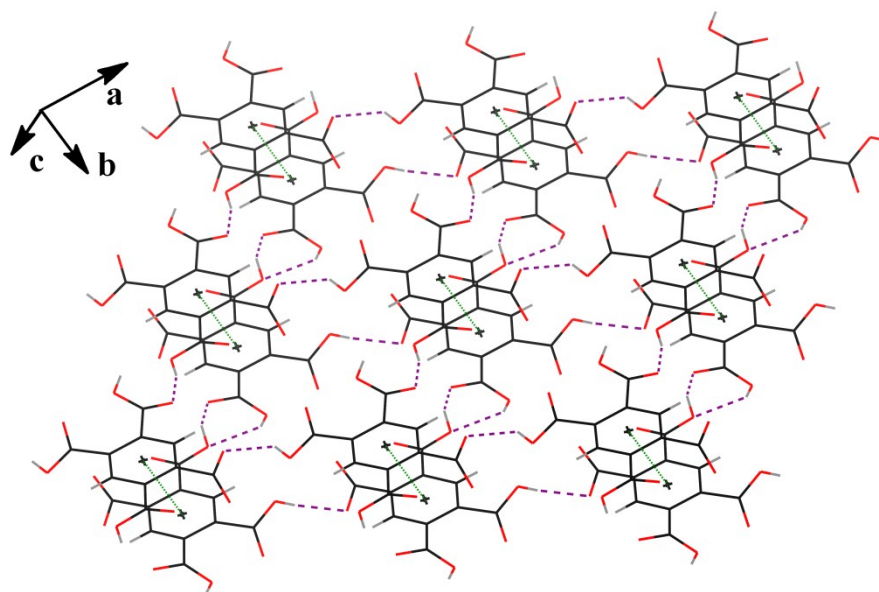

**Fig. S5** The  $\pi$ - $\pi$  stacking interactions of benzene rings in two adjacent layers in OCC 2.

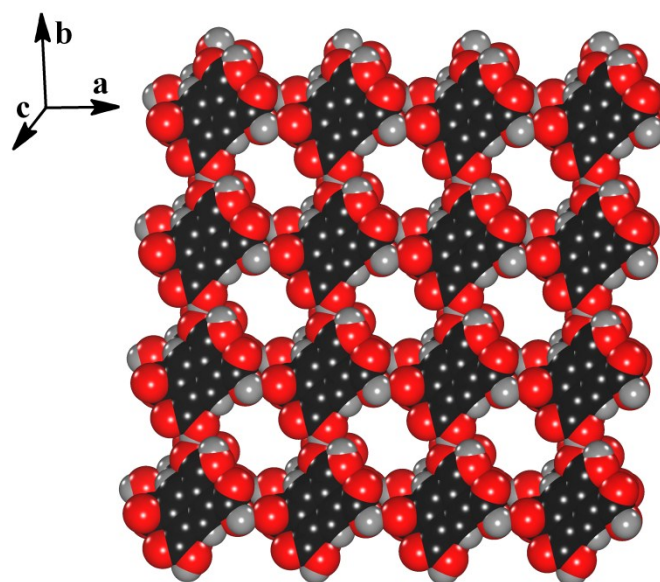

**Fig. S6** The cavity with dimensions of  $5.486 \times 8.040 \text{ \AA}^2$  in OCC 2.

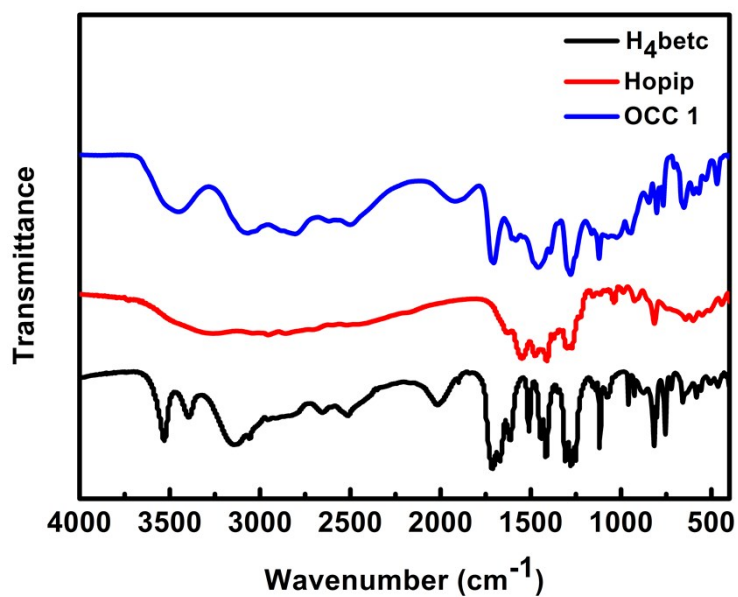

**Fig. S7** IR absorption spectra of H<sub>4</sub>betc, Hopip and OCC 1 in the solid state at room temperature.

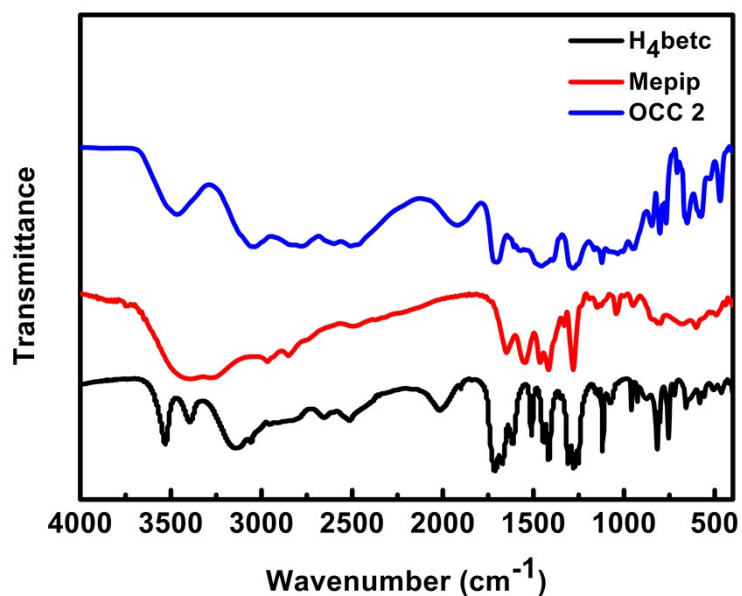

**Fig. S8** IR absorption spectra of H<sub>4</sub>betc, Mepip and OCC 2 in the solid state at room temperature.

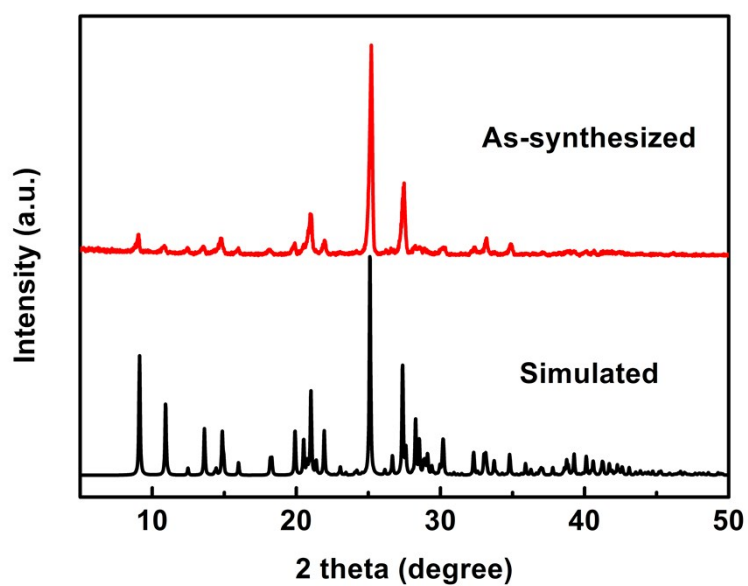

**Fig. S9** The PXRD patterns for OCC 1 of a simulation based on single-crystal analysis and as-synthesized bulk crystals.

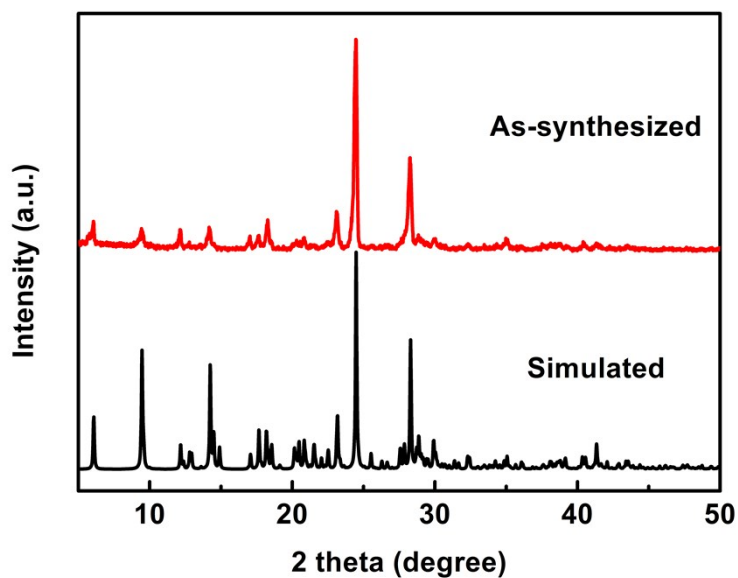

**Fig. S10** The PXRD patterns for OCC 2 of a simulation based on single-crystal analysis and as-synthesized bulk crystals.



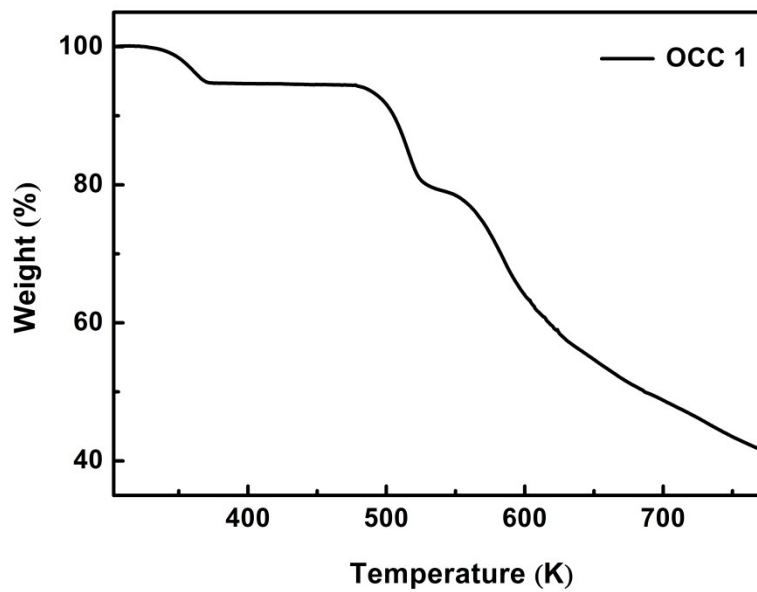

**Fig. S11** Thermogravimetric curve for OCC 1.

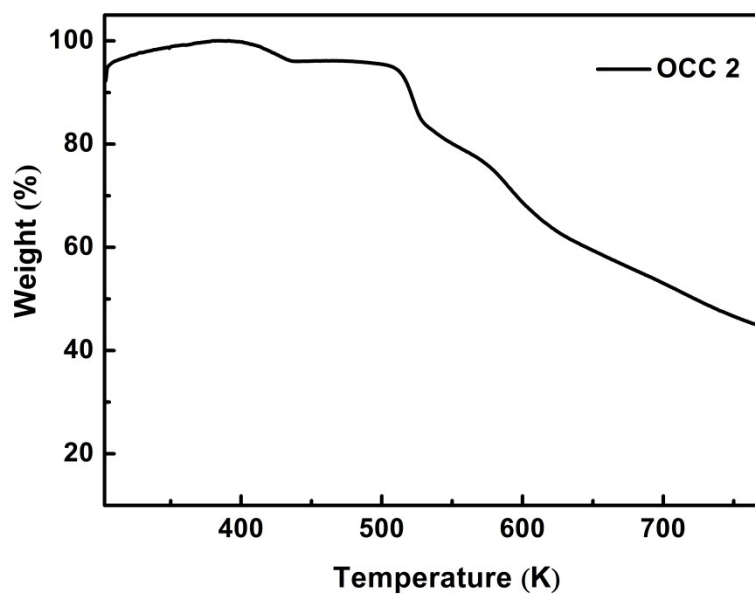

**Fig. S12** Thermogravimetric curve for OCC 2.

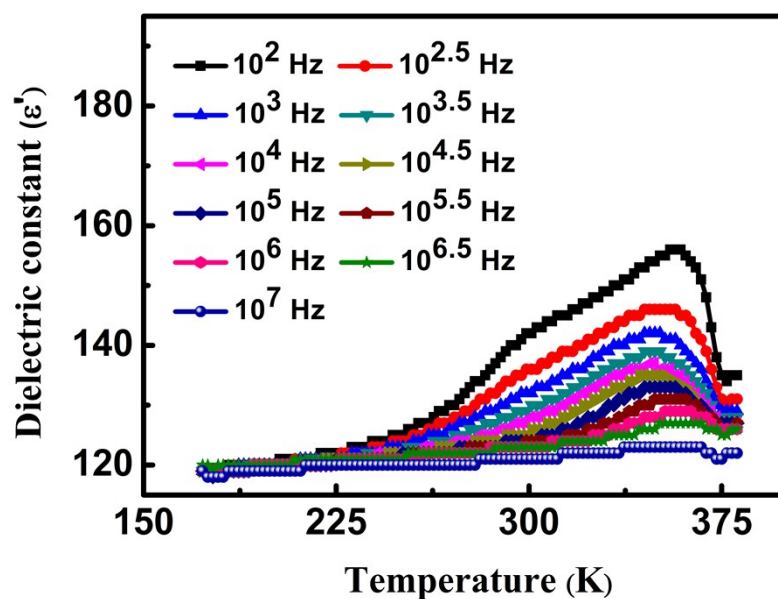

**Fig. S13** The dielectric constant ( $\epsilon'$ ) for OCC 1 measured as a function of temperature at various frequencies in the heating process.

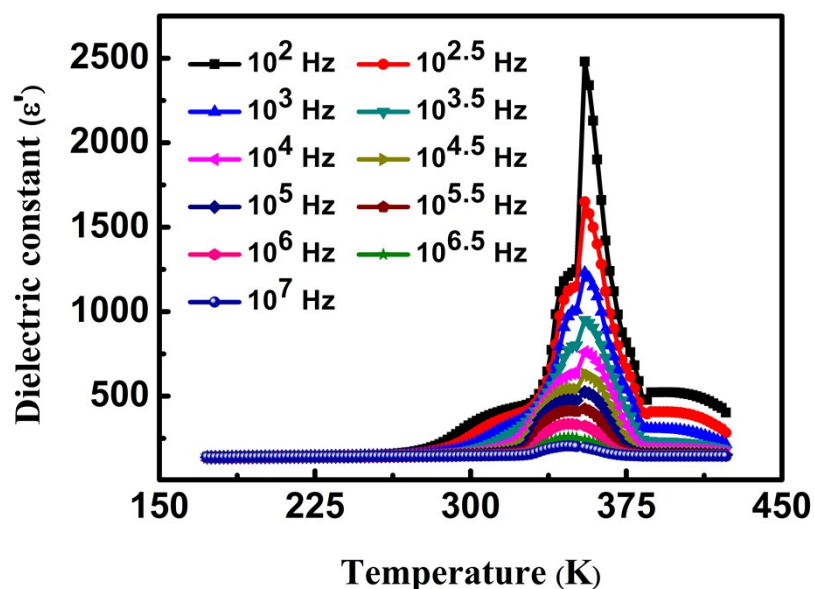

**Fig. S14** The dielectric constant ( $\epsilon'$ ) for OCC 2 measured as a function of temperature at various frequencies in the heating process.

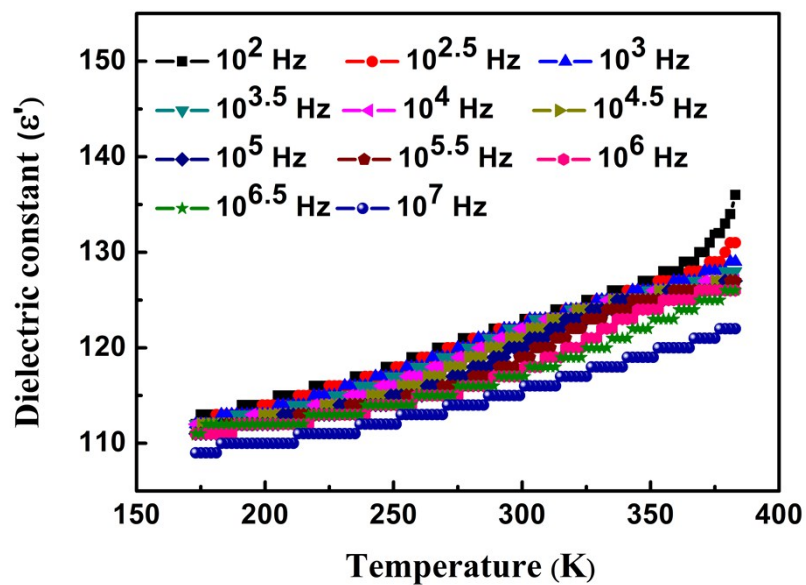

**Fig. S15** The dielectric constant ( $\epsilon'$ ) for OCC 1 measured as a function of temperature at various frequencies in the cooling process.

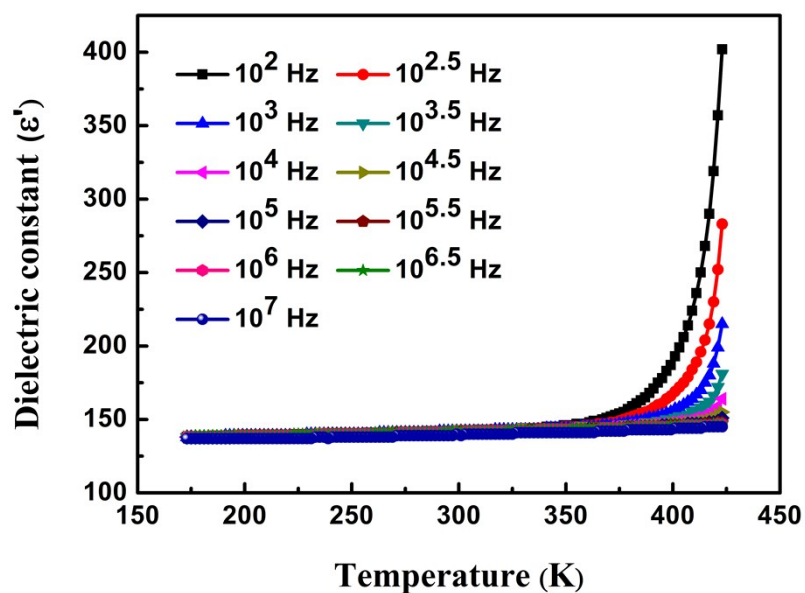

**Fig. S16** The dielectric constant ( $\epsilon'$ ) for OCC 2 measured as a function of temperature at various frequencies in the cooling process.

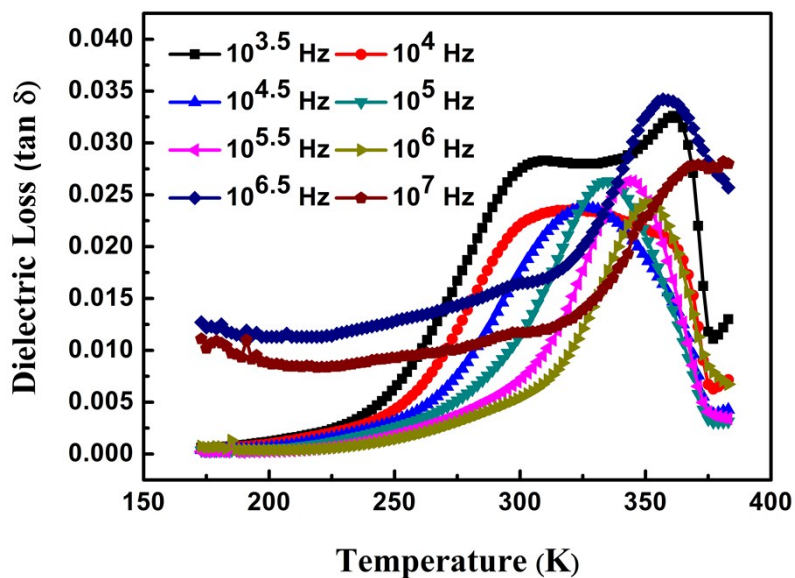

**Fig. S17** The dielectric loss ( $\tan \delta$ ) for OCC 1 measured as a function of temperature at various frequencies in the heating process.

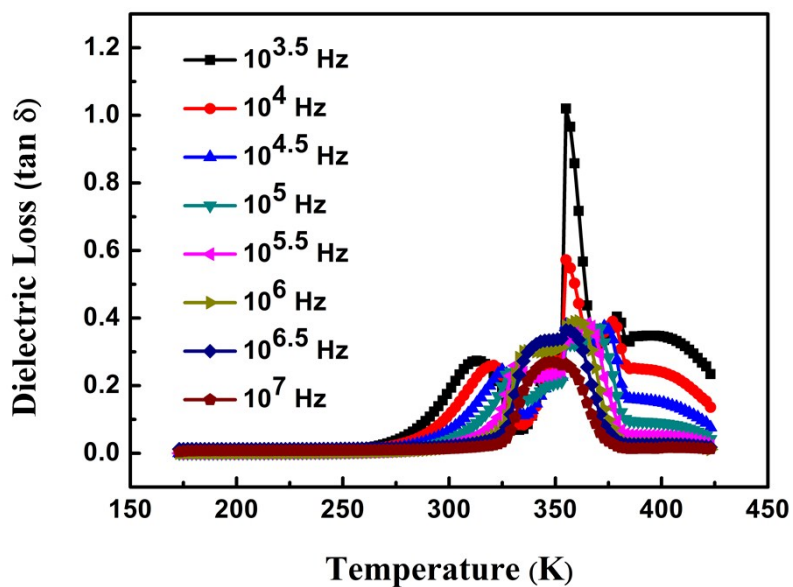

**Fig. S18** The dielectric loss ( $\tan \delta$ ) for OCC 2 measured as a function of temperature at various frequencies in the heating process.

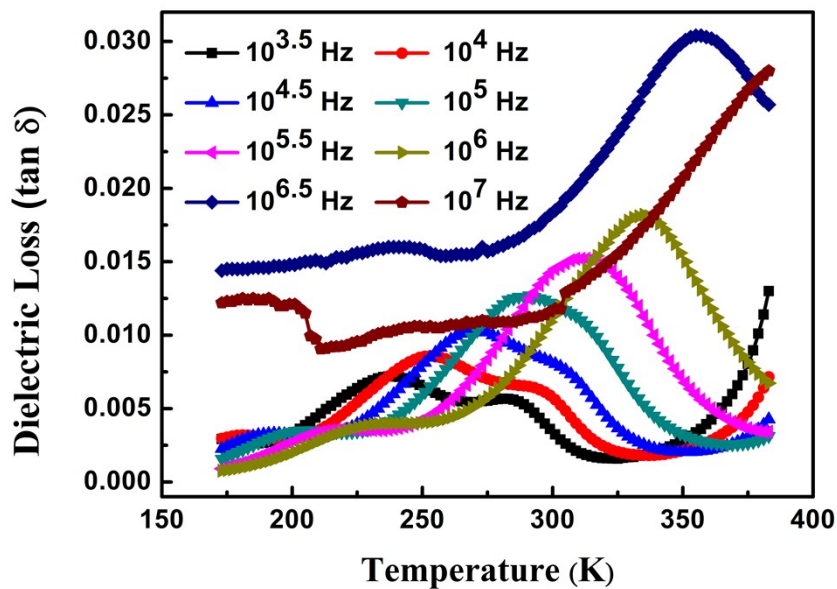

**Fig. S19** The dielectric loss ( $\tan \delta$ ) for OCC 1 measured as a function of temperature at various frequencies in the cooling process.

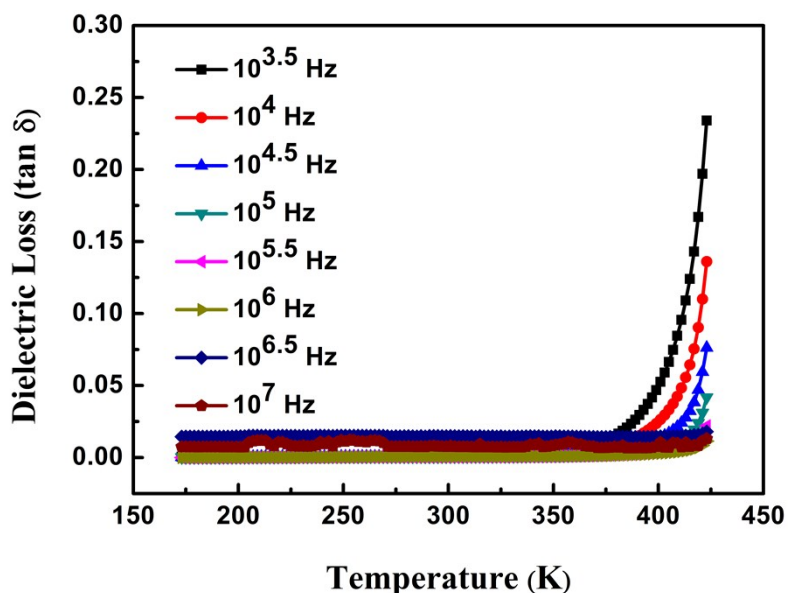

**Fig. S20** The dielectric loss ( $\tan \delta$ ) for OCC 2 measured as a function of temperature at various frequencies in the cooling process.

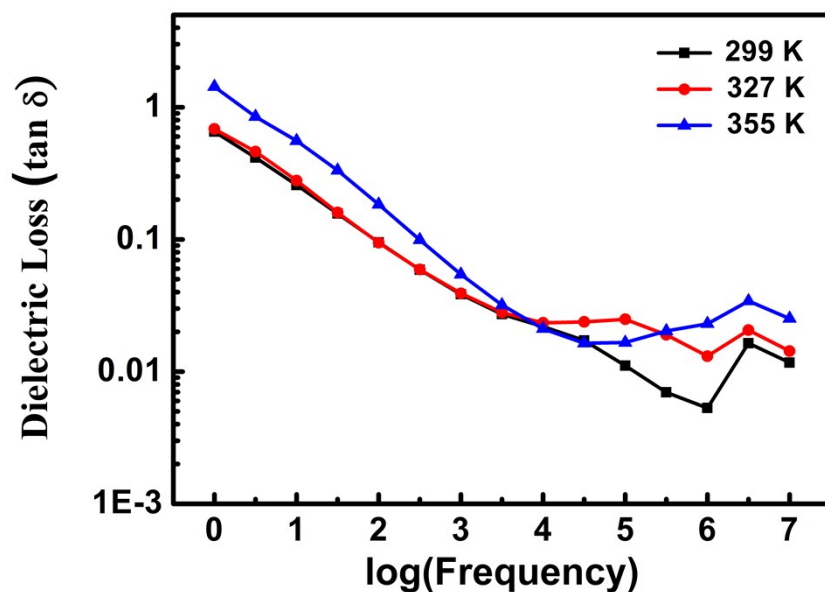

**Fig. S21** The dielectric loss ( $\tan \delta$ ) for OCC 1 measured as a function of frequency at various temperatures in the heating process.

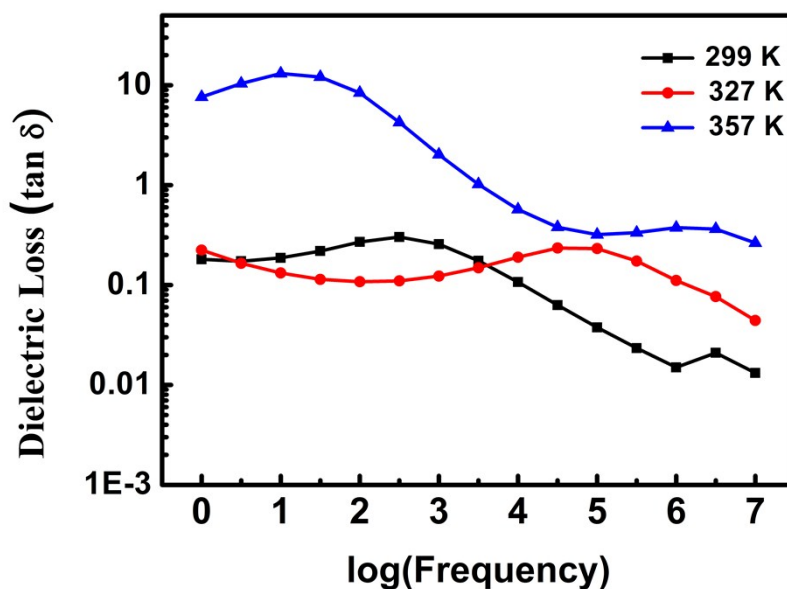

**Fig. S22** The dielectric loss ( $\tan \delta$ ) for OCC 2 measured as a function of frequency at various temperatures in the heating process.

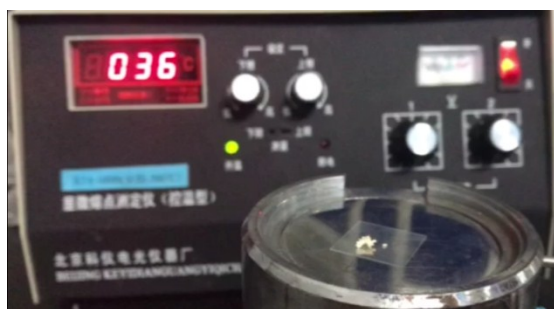

(a)

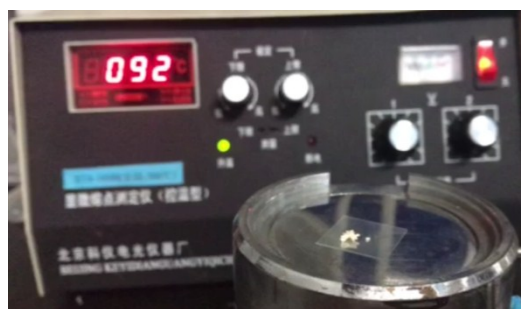

(b)

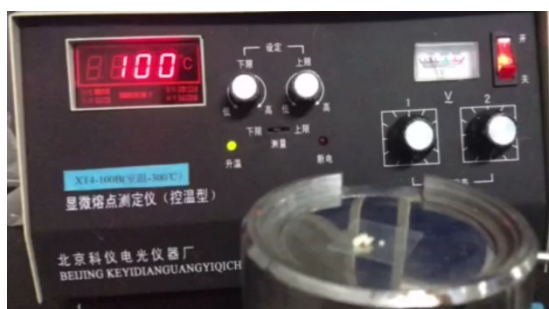

(c)

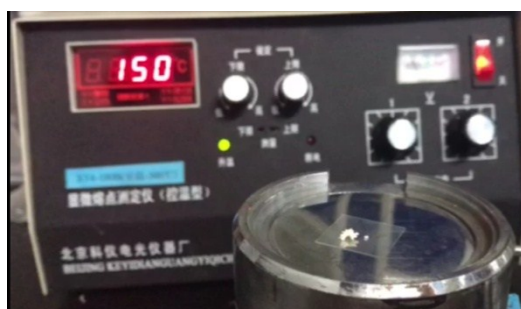

(d)

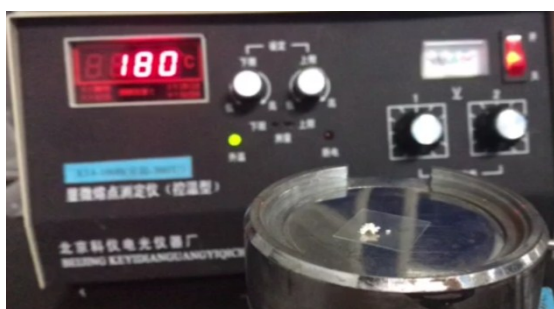

(e)

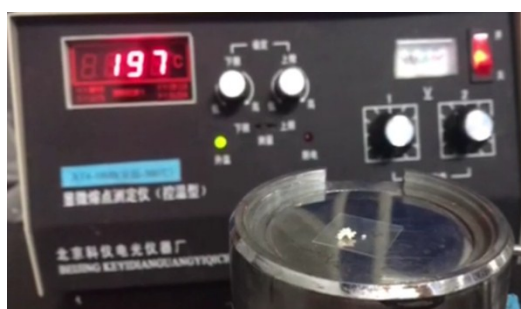

(f)

**Fig. S23** Plots of the state of OCC 1 at (a) 36 °C (309 K), (b) 92 °C (365 K), (c) 100 °C (373 K), (d) 150 °C (423 K), (e) 180 °C (453 K), (f) 197 °C (470 K) in the process of melting point measurement.



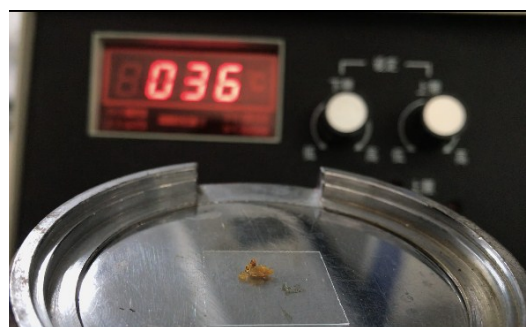

(a)

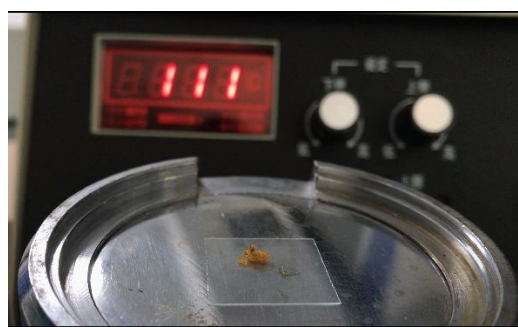

(b)

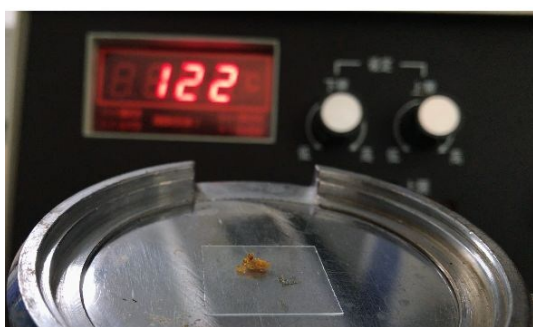

(c)

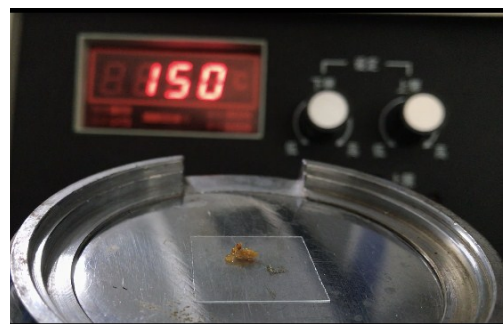

(d)

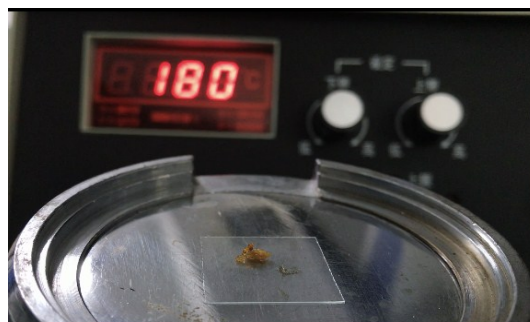

(e)

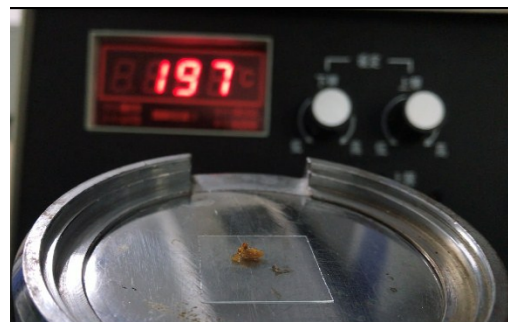

(f)

**Fig. S24** Plots of the state of OCC **2** at (a) 36 °C(309 K), (b) 111 °C(384 K), (c) 122 °C (395 K), (d) 150 °C(423 K), (e) 180 °C(453 K), (f) 197 °C(470 K) in the process of melting point measurement.



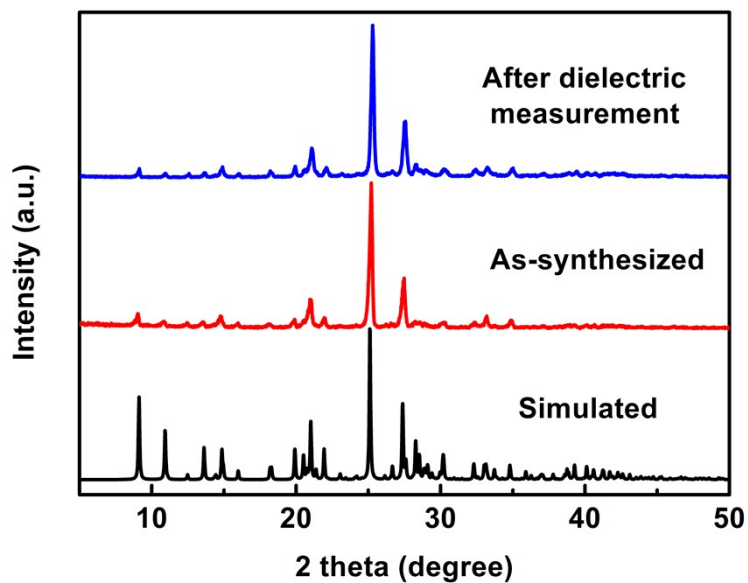

**Fig. S25** The PXRD patterns for OCC 1 of samples after the dielectric measurement, as-synthesized and simulated from single-crystal.

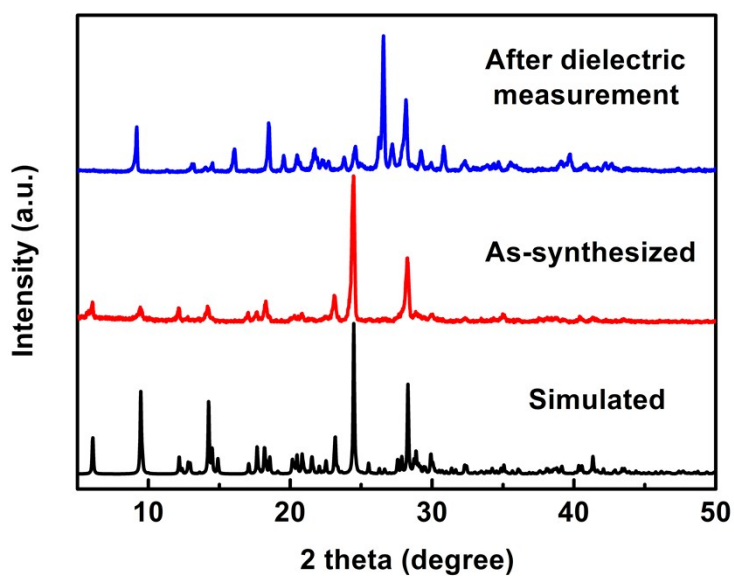

**Fig. S26** The PXRD patterns for OCC 2 of samples after the dielectric measurement, as-synthesized and simulated from single-crystal.

**Table S2.** Raman frequencies (cm<sup>-1</sup>) of OCC 1 and OCC 2 and suggested assignment

| Raman frequency (cm <sup>-1</sup> ) | Suggested assignment                                 |
|-------------------------------------|------------------------------------------------------|
| OCC 1                               |                                                      |
| 676(m)                              | $\gamma(-\text{NH}^{2+})^a$                          |
| 741(m), 773(m), 782 (vw)            | $\gamma(-\text{NH}^{2+})^b$                          |
| 800(m), 808(s)                      | $\nu_{\text{asym}}(\text{O}-\text{H}\cdots\text{O})$ |
| 1163(m)                             | $\beta(\text{C}-\text{H})$                           |
| 1259(m), 1390(s)                    | $\nu_{\text{asym}}(-\text{COO}^-)$                   |
| 1567(w), 1608(s), 1565(w)           | $\nu_{\text{sym}}(-\text{COO}^-)$                    |
| 1703(w)                             | $\nu(\text{C}=\text{O}) + \delta(\text{OH})$         |
| OCC 2                               |                                                      |
| 675(m)                              | $\gamma(-\text{NH}^{2+})^a$                          |
| 782(w), 792(w)                      | $\gamma(-\text{NH}^{2+})^b$                          |
| 800(m), 808(s)                      | $\nu_{\text{asym}}(\text{O}-\text{H}\cdots\text{O})$ |
| 1167(s)                             | $\beta(\text{C}-\text{H})$                           |
| 1261(vw), 1391(s)                   | $\nu_{\text{asym}}(-\text{COO}^-)$                   |
| 1570(m), 1607(s)                    | $\nu_{\text{sym}}(-\text{COO}^-)$                    |
| 1722(vw)                            | $\nu(\text{C}=\text{O}) + \delta(\text{OH})$         |

<sup>a</sup>wagging mode; <sup>b</sup> twist mode;  $\gamma$ -deformation out of plane;  $\nu_{\text{asym}}$  - asymmetric stretching;  $\nu_{\text{sym}}$  - symmetric stretching;  $\beta$  -in-plane-bending;  $\delta$  - deformation in plane; vw-very weak, w-weak, m-medium, s-strong.

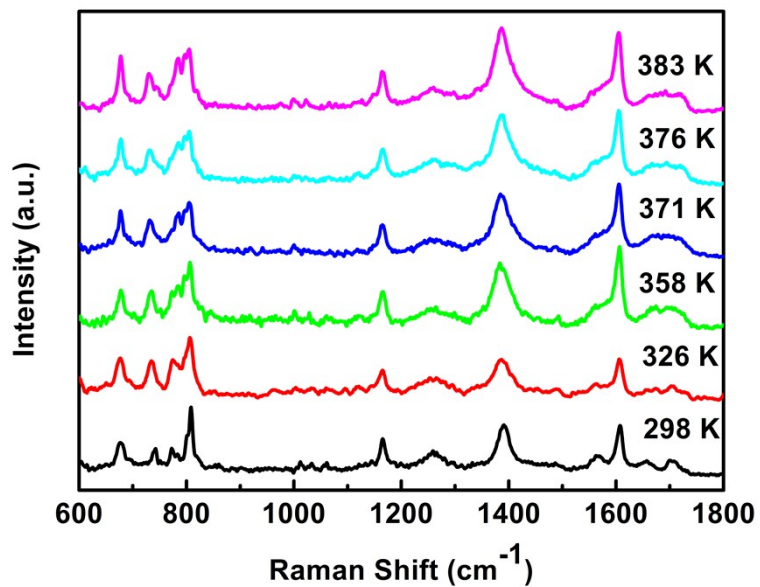

**Fig. S27** Temperature evolution of Raman bands of OCC 1 in the region of 600–1800  $\text{cm}^{-1}$ .

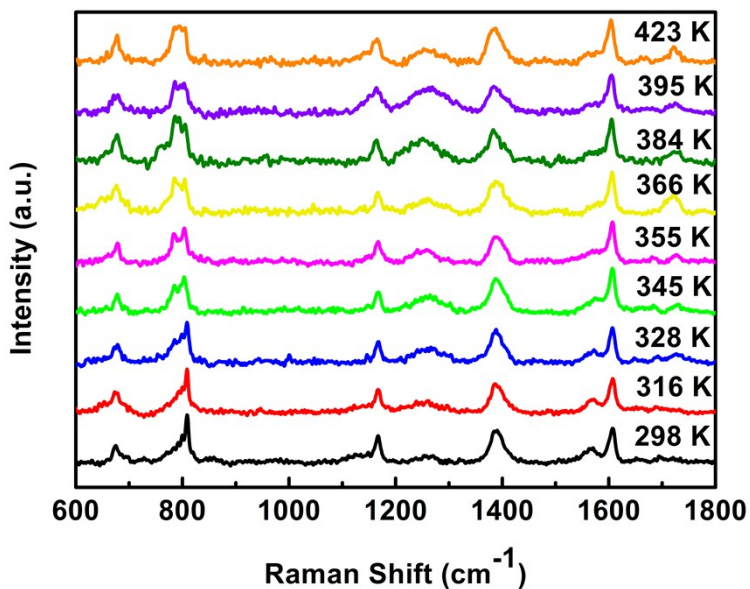

**Fig. S28** Temperature evolution of Raman bands of OCC 2 in the region of 600–1800  $\text{cm}^{-1}$ .

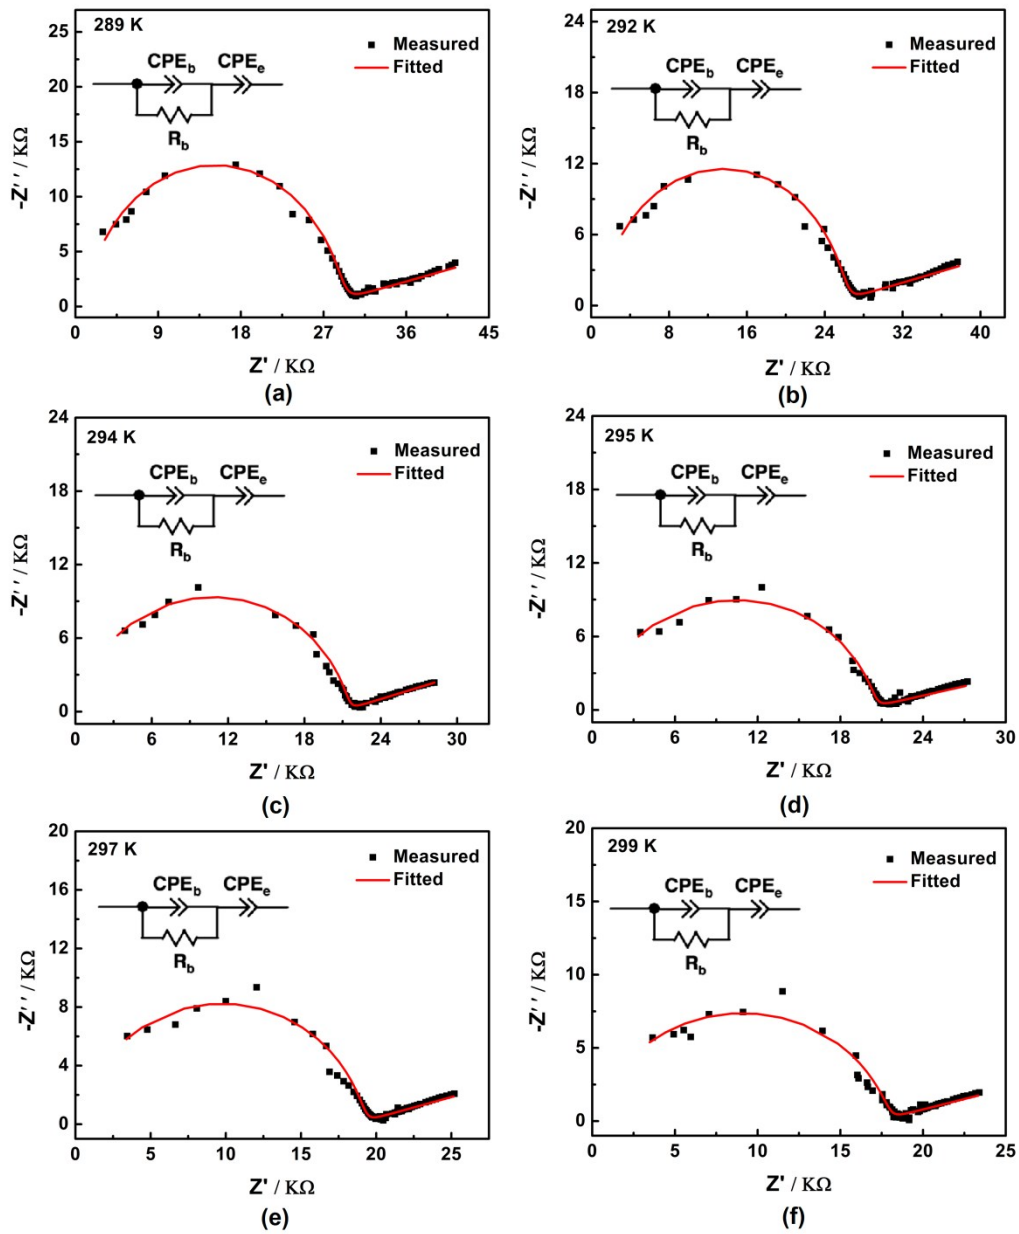

**Fig. S29** Nyquist plots of OCC 1 at different temperatures and ~97% RH (relative humidity).

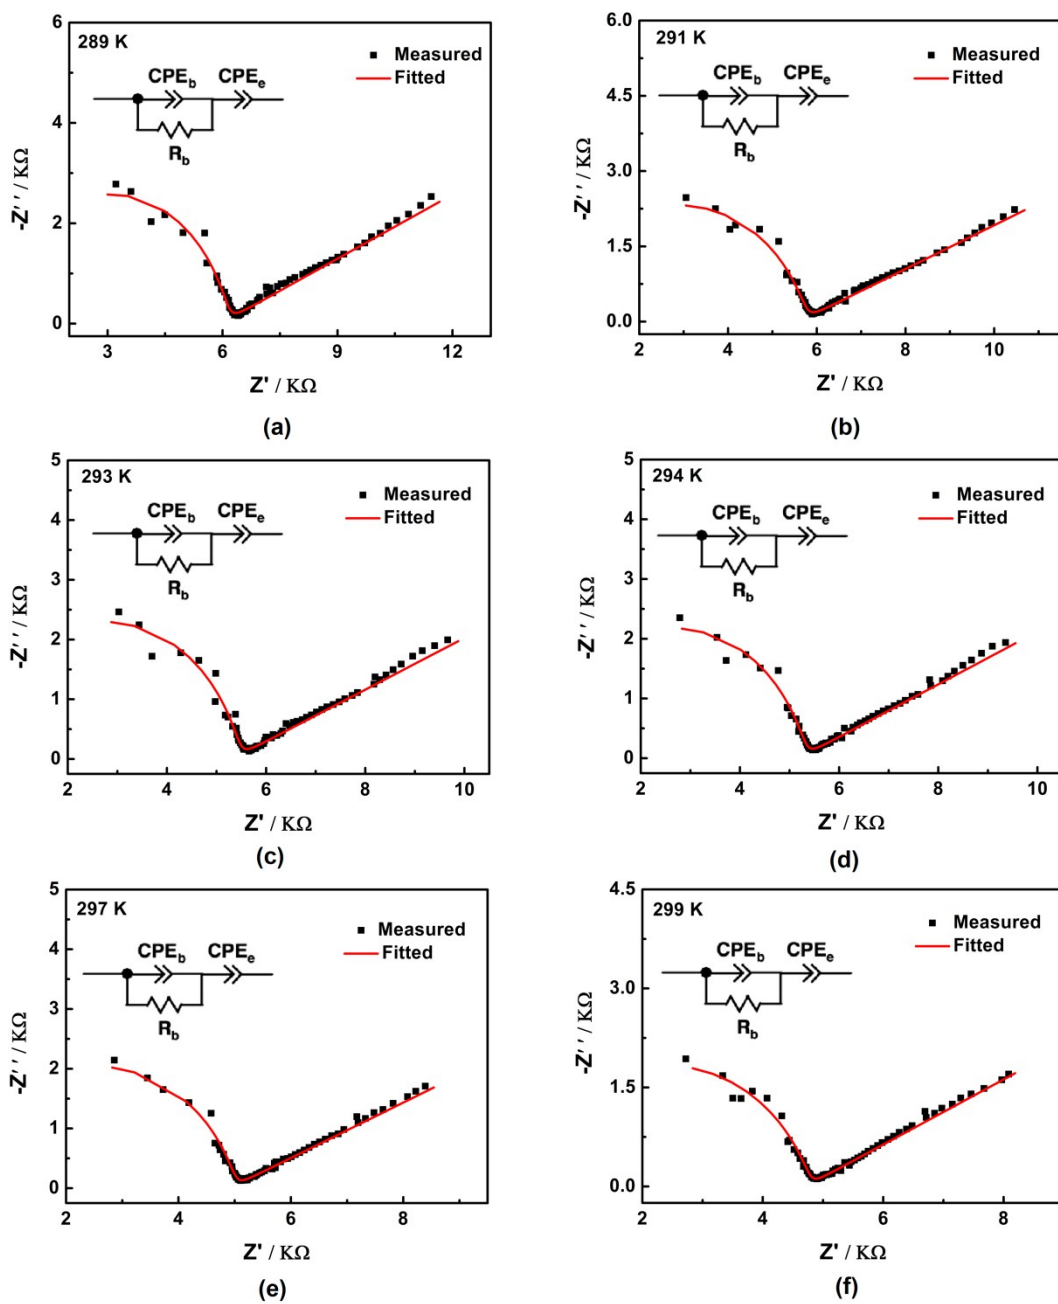

**Fig. S30** Nyquist plots of OCC 2 at different temperatures and  $\sim 97\%$  RH (relative humidity).

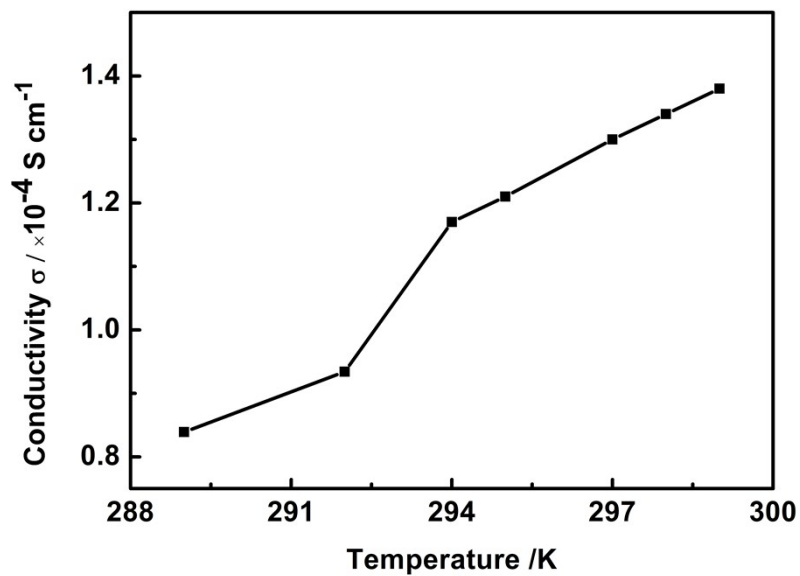

**Fig. S31** Temperature dependence of the conductivity ( $\sigma$ ) for OCC 1 at ~97% RH.

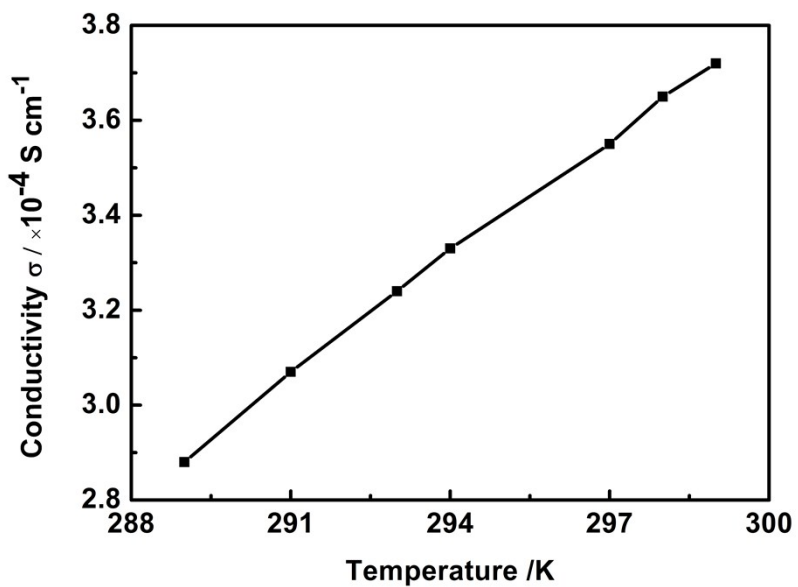

**Fig. S32** Temperature dependence of the conductivity ( $\sigma$ ) for OCC 2 at ~97% RH.

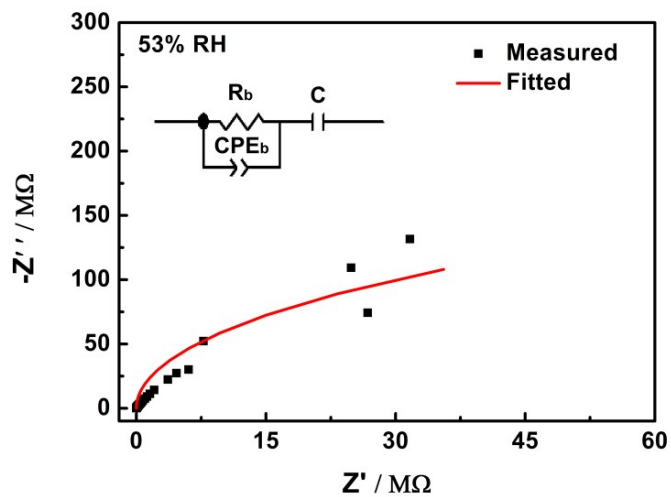

(a)

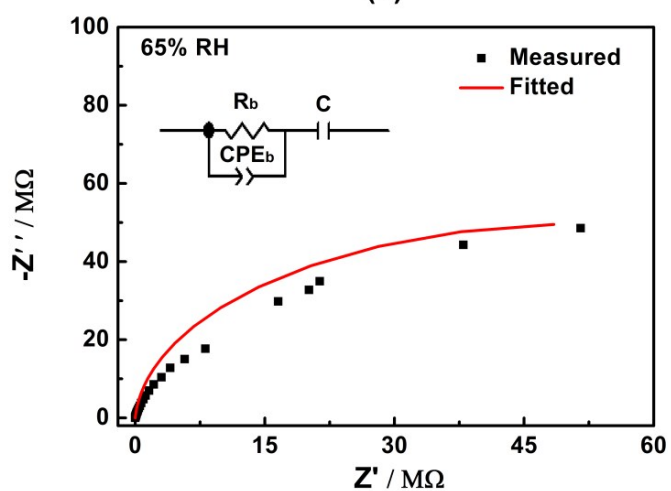

(b)

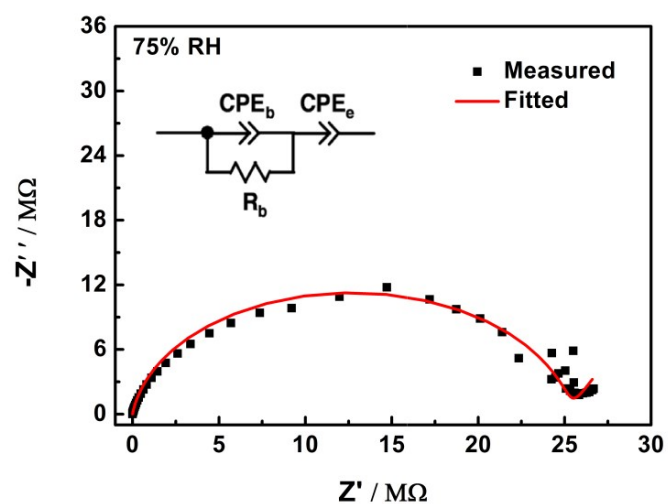

(c)

**Fig. S33** Nyquist plots of OCC 1 at different RH (relative humidity) and 298 K.

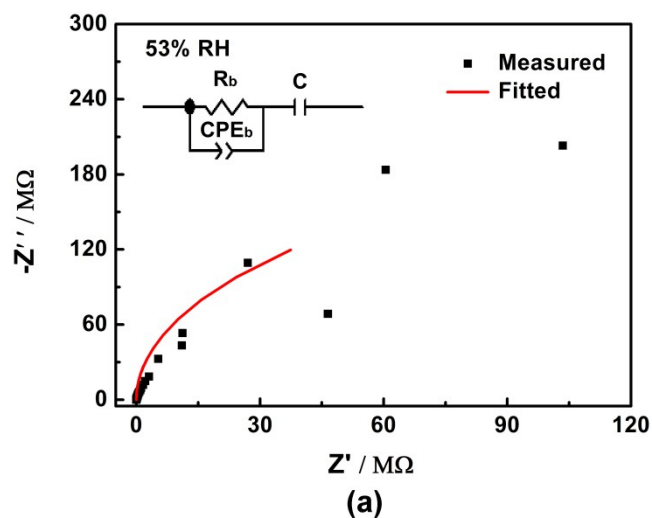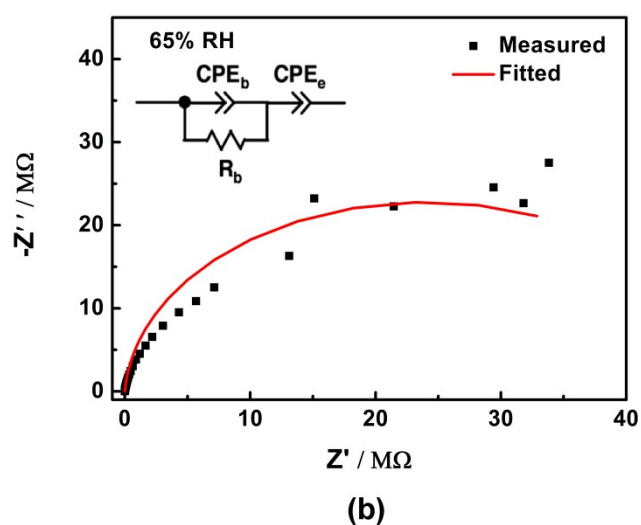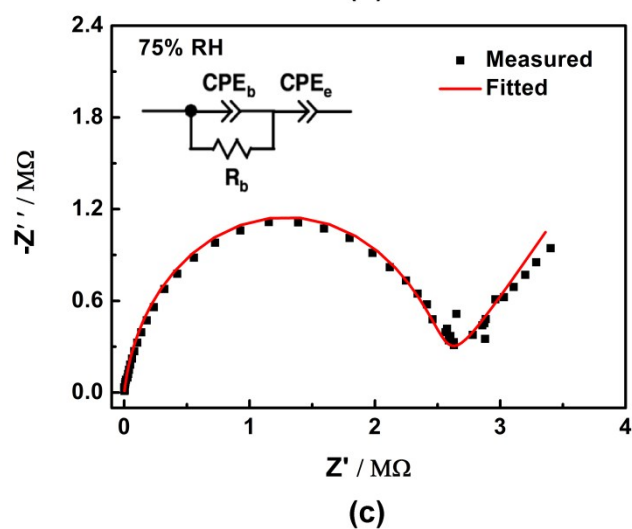

Fig. S34 Nyquist plots of OCC 2 at different RH (relative humidity) and 298 K.



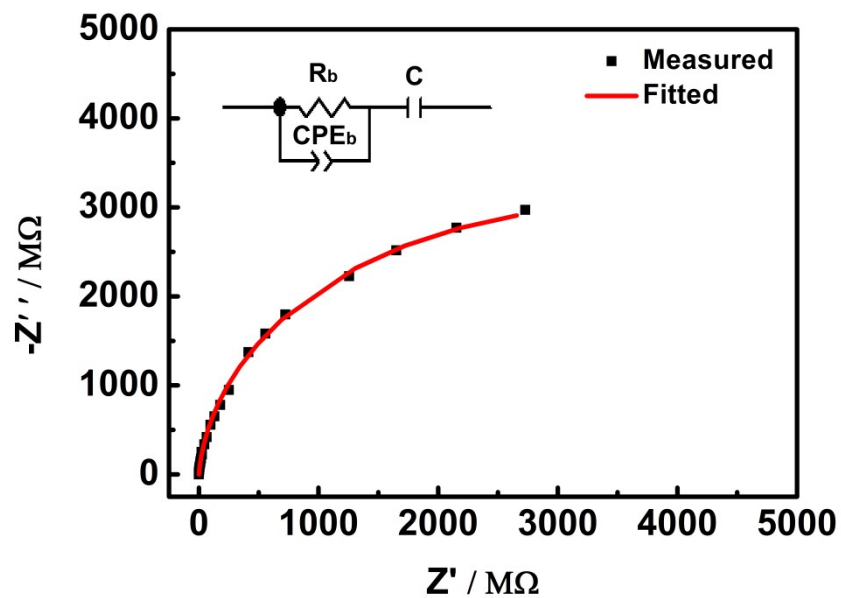

**Fig. S35** Nyquist plot of OCC 1 at ambient conditions and at 299 K.

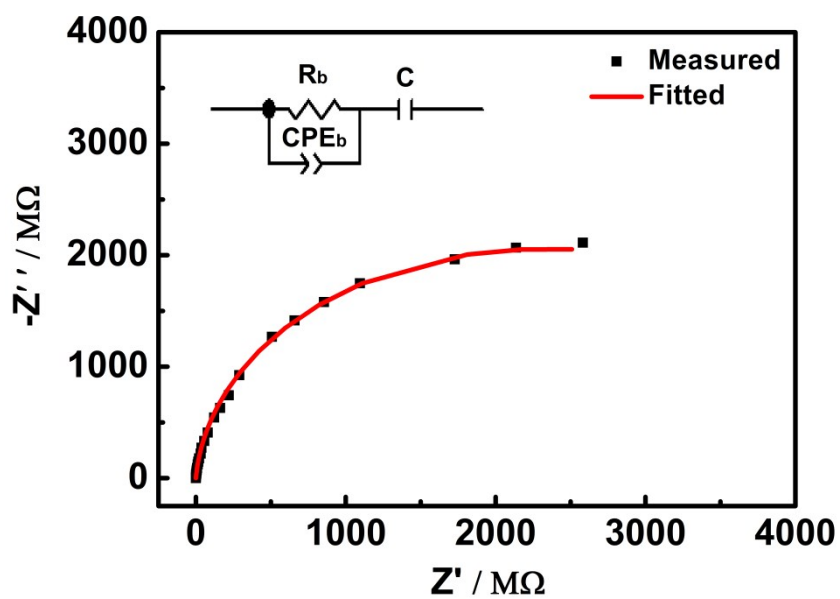

**Fig. S36** Nyquist plot of OCC 2 at ambient conditions and at 299 K.

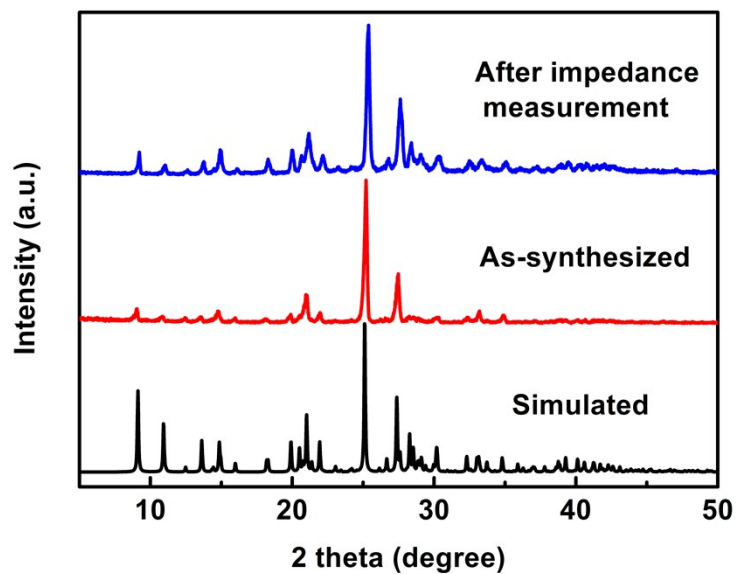

**Fig. S37** The PXR D patterns for OCC 1 of samples after the impedance measurement, as-synthesized and simulated from single-crystal.

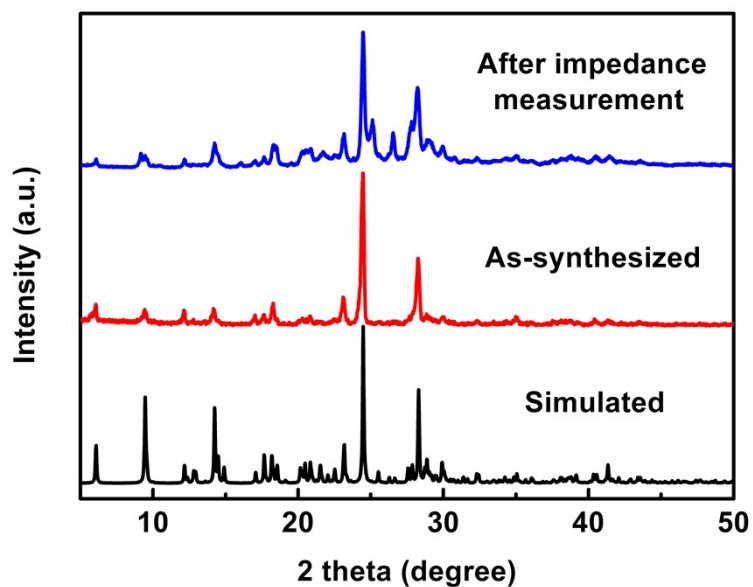

**Fig. S38** The PXR D patterns for OCC 2 of samples after the impedance measurement, as-synthesized and simulated from single-crystal.
